# Supplementary material
Source: publisher site journal article supplement (https://www.degruyter.com/publication/journal_key/GEO/downloadAsset/GEO_CFP%20ISDE12.pdf)
Supplement: Supplementary file 1 [file GEO_CFP%20ISDE12.pdf]

# Call for papers – Special Issue MONITORING EARTH SURFACE DYNAMICS WITH REMOTE SENSING – ISDE12

## GUEST EDITORS

---

Dr. Daniel Hölbling and Dr. Benjamin Aubrey Robson

## DESCRIPTION

---

Remote sensing allows for effectively analysing earth surface dynamics and changes related to natural hazards, and respective findings can contribute to a better understanding of such processes and their potential impacts on society. New sensors such as UAVs and cubesats, combined with powerful new processing techniques such as artificial intelligence allow new insights into landscape dynamics. This special issue aims to gather articles that employ different types of aerial and satellite remote sensing data and technologies to monitor earth surface dynamics and processes in the light of the Digit Earth initiative. For example, this includes the assessment of natural hazards such as landslides, anthropogenic and natural variability of the environment and related changes, e.g. glacier retreat, deforestation, or changes related to ground subsidence or sea-level rise. We also welcome contributions that assess the drivers of dynamics and changes identified by remote sensing, the potential impacts on the society and environment, and how findings can contribute to sustainable development to meet the Sustainable Development Goals (SDGs).

The 12th International Symposium on Digital Earth (ISDE12) will be held on July 6-8, 2021 online and on-site in Salzburg, Austria. This special issue is directly related to this event. We invite front-line researchers and authors to submit original research and review articles focused on remote sensing, to better understand the advances & challenges of monitoring Earth surface dynamics worldwide. Submissions on the following topics are invited, but are not limited to:

- (a) Multi-scale and multi-sensor change detection approaches
- (b) Time series analysis with big Earth Observation (EO) data
- (c) Remote sensing-based monitoring of earth surface dynamics and natural hazards
- (d) Linking remote sensing results to triggering events and drivers, e.g. climate change
- (e) Using remote sensing results to understand and assess impacts on the society for a sustainable future

All participants presenting original researches or reviews are welcome to publish their works in the Special Issue of *Open Geosciences*.

## HOW TO SUBMIT

---

All manuscripts (research and review papers) should be submitted online at <https://www.editorialmanager.com/opengeo/>. The submitted manuscripts should meet the requirements provided in [Instruction for Authors](#). Authors are encouraged to use the Open Geosciences [Manuscript Template](#).

The online paper processing system provides a track dedicated to this Special Issue. Authors submitting their articles to the special issue are asked choose "Monitoring Earth surface dynamics with Remote Sensing - ISDE12" as an article type. *Open Geosciences* ensures that all submitted papers will be considered by the editor and will go through a peer-review process as any other paper. Accepted articles will be indexed, abstracted and published.

The deadline for submission is January 31, 2022. Once a paper is accepted for publication, authors will be asked to cover Article Processing Charges (APC). The authors associated with this special issue can take advantage of a special 30% discount on APC.

In case of questions or further detailed information please contact Managing Editor - Dr. Jan Barabach ([jan.barabach@degruyter.com](mailto:jan.barabach@degruyter.com)).

- Authors publishing in *Open Geosciences* enjoy the following benefits:
- IMPACT FACTOR (2019) - 0.985
- no submission charges
- fast, comprehensive and transparent peer-review
- free language assistance for authors from non-English speaking regions
- immediate publication upon completing the publishing process
- comprehensive abstracting and indexing - JCR and SCIE, SCOPUS
- extensive promotion and worldwide distribution of each published article
